# Supplementary material
Source: PubMed Central journal article supplement (PMC2773087)
Supplement: pp.109.144196_1.pdf [file pp.109.144196_1.pdf]

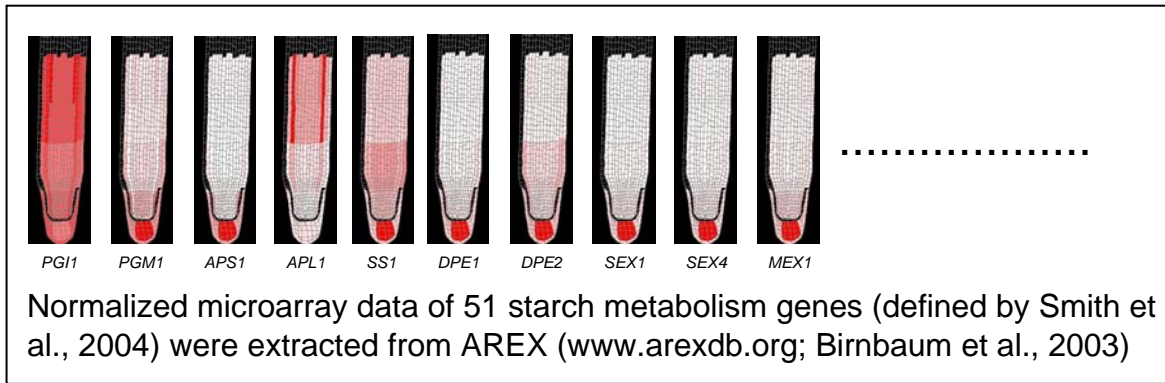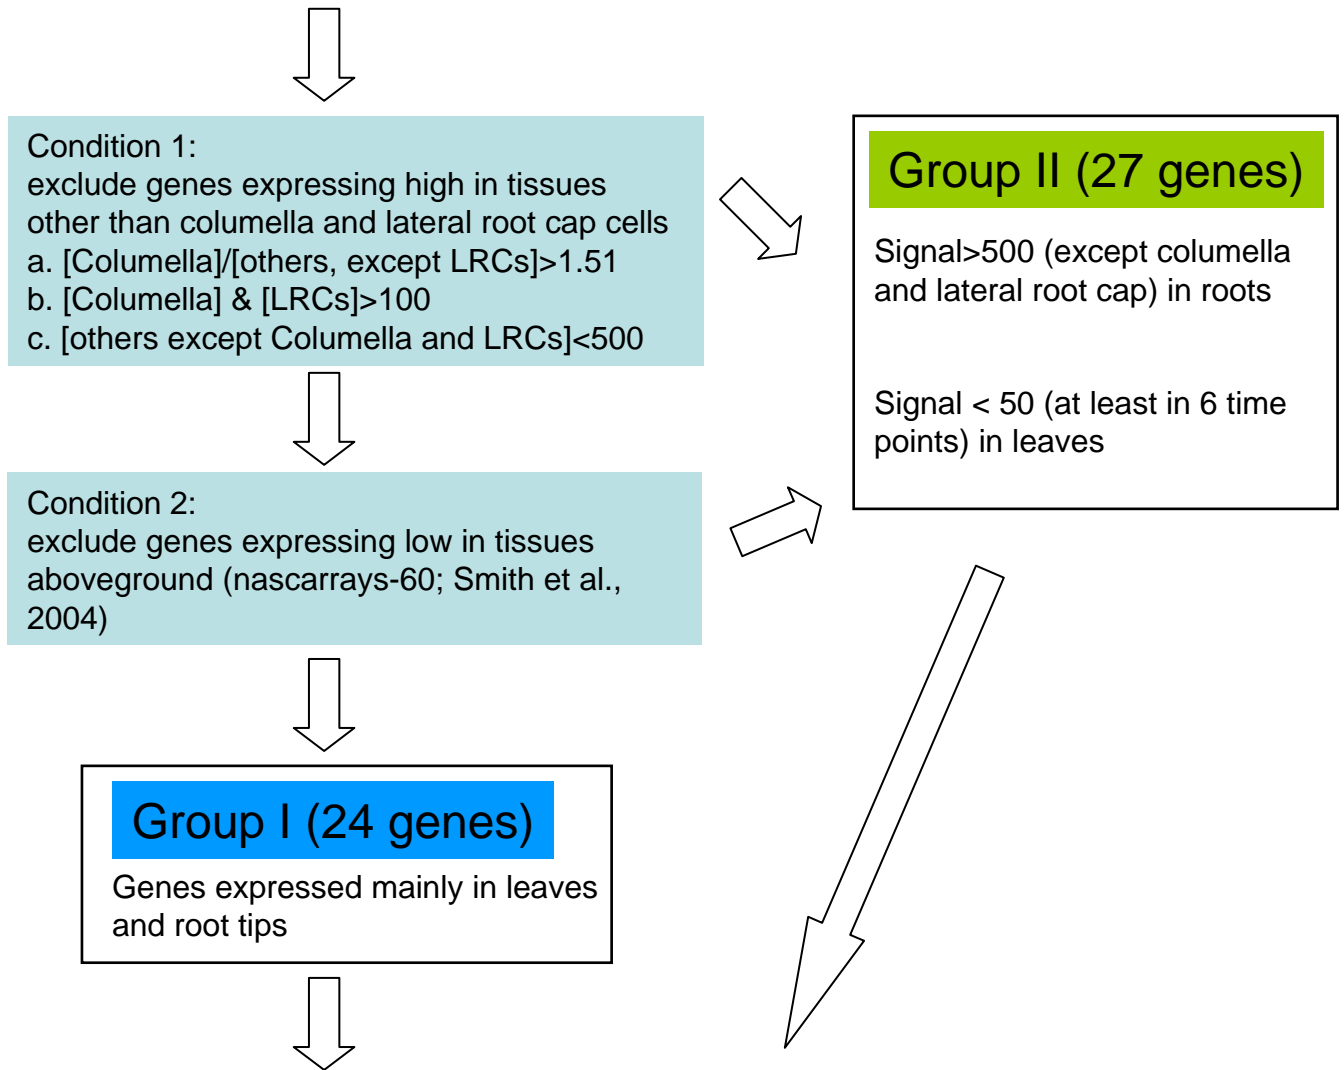

1. Gene expression map of development (Schmid et al., 2005)
2. Regulatory elements of promoters analysis

**Figure S1.** A flow-chart diagram for steps and parameters used in the expression profile analysis of starch metabolism genes.

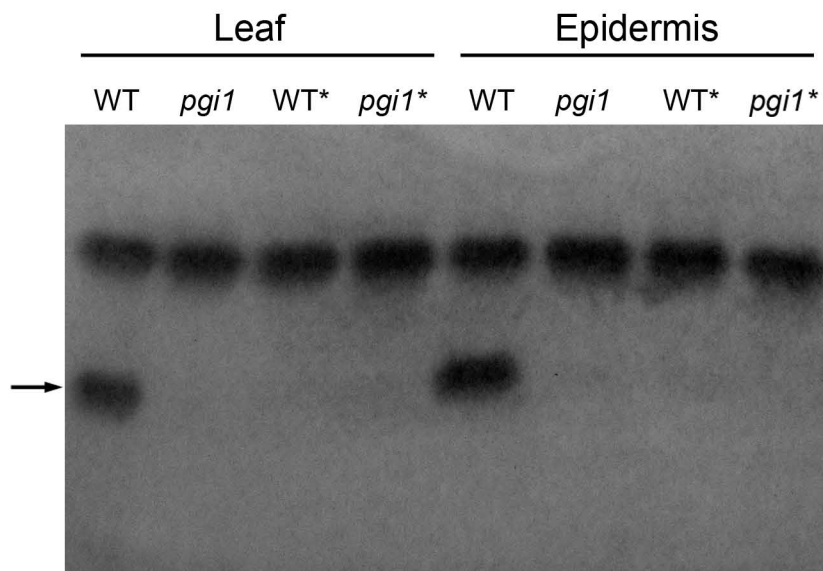

Figure S2. Heat inactivation of PGI isozymes in epidermis and leaf extracts of wild type and *pgi1* mutant

Epidermis and Leaf extracts of the wild type (WT) and *pgi1* were separated by a 7.5% native gel and stained for PGI activity. From each extract 20  $\mu$ g of total protein was loaded. Two PGI activity bands were detected in the wild type extract. The plastidial PGI activity (arrow) was not present in the *pgi1* extract. For heat inactivation, the extracts were treated at 50°C for 10 min (asterisk). Upon heat inactivation, the plastidial PGI activity in the wild type was inactivated, while the cytosolic PGI activity was not affected.

**Supplemental Table S1.** Starch metabolism genes defined by Smith et al., 2004 (Smith et al., 2004)

|           | Genome locus | Gene name                     |
|-----------|--------------|-------------------------------|
| Group I.  |              |                               |
|           | At1g03310    | <i>ISA2</i>                   |
|           | At1g10760    | <i>GWD1</i>                   |
|           | At1g11720    | <i>SS3</i>                    |
|           | At1g32900    | <i>GBS1</i>                   |
|           | At1g69830    | <i>AMY3</i>                   |
|           | At1g76130    | <i>AMY2</i>                   |
|           | At2g36390    | <i>SBE3</i>                   |
|           | At2g39930    | <i>ISA1</i>                   |
|           | At2g40840    | <i>DPE2</i>                   |
|           | At3g01180    | <i>SS2</i>                    |
|           | At3g10940    | <i>SEX4-Like2<sup>a</sup></i> |
|           | At3g29320    | <i>PHS1</i>                   |
|           | At3g46970    | <i>PHS2</i>                   |
|           | At3g52180    | <i>SEX4<sup>a</sup></i>       |
|           | At4g00490    | <i>BAM2</i>                   |
|           | At4g09020    | <i>ISA3</i>                   |
|           | At4g18240    | <i>SS4</i>                    |
|           | At5g03650    | <i>SBE2</i>                   |
|           | At5g17520    | <i>MEX1</i>                   |
|           | At5g24300    | <i>SS1</i>                    |
|           | At5g26570    | <i>GWD3</i>                   |
|           | At5g48300    | <i>APS1</i>                   |
|           | At5g51820    | <i>PGM1</i>                   |
|           | At5g64860    | <i>DPE1</i>                   |
| Group II. |              |                               |
|           | At1g05610    | <i>APS2</i>                   |
|           | At1g27680    | <i>APL2</i>                   |
|           | At1g68560    | <i>AGL5</i>                   |
|           | At2g21590    | <i>APL4</i>                   |
|           | At2g32290    | <i>BAM6</i>                   |
|           | At2g45880    | <i>BAM7</i>                   |
|           | At3g01510    | <i>SEX4-Like1<sup>a</sup></i> |
|           | At3g20440    | <i>SBE1</i>                   |

|           |             |
|-----------|-------------|
| At3g23640 | <i>AGL1</i> |
| At3g23920 | <i>BAM1</i> |
| At3g45940 | <i>AGL3</i> |
| At4g15210 | <i>BAM5</i> |
| At4g17090 | <i>BAM3</i> |
| At4g24450 | <i>GWD2</i> |
| At4g24620 | <i>PGII</i> |
| At4g25000 | <i>AMY1</i> |
| At4g39210 | <i>APL3</i> |
| At5g04360 | <i>LDA1</i> |
| At5g11720 | <i>AGL4</i> |
| At5g16150 | <i>GLT1</i> |
| At5g18670 | <i>BAM9</i> |
| At5g19220 | <i>APL1</i> |
| At5g45300 | <i>BAM8</i> |
| At5g46110 | <i>TPT1</i> |
| At5g55700 | <i>BAM4</i> |
| At5g63840 | <i>AGL2</i> |
| At5g65685 | <i>GLS1</i> |

---

<sup>a</sup>*SEX4* was proved involved in starch degradation (Niittyla et al., 2006; Kotting et al., 2009)

**Supplemental Table S2.** Samples extracted from microarray data of AT-40<sup>a</sup>

| Tissue No. <sup>b</sup> | Organism part name |
|-------------------------|--------------------|
| 1                       | Col-0_cotyl        |
| 2                       | Col-0_hyp          |
| 3                       | Col-0_root7        |
| 4                       | Col-0_veg_leaf     |
| 5                       | Col-0_leaf_1-2     |
| 6                       | Col-0_shoot_veg    |
| 7                       | Col-0_seedl_green  |
| 8                       | Col-0_shoot_trans  |
| 9                       | Col-0_root17       |
| 10                      | Col-0_roset4_11    |
| 11                      | Col-0_roset2       |
| 12                      | Col-0_roset4       |
| 13                      | Col-0_roset6       |
| 14                      | Col-0_roset8       |
| 15                      | Col-0_roset10      |
| 16                      | Col-0_roset12      |
| 17                      | Col-0_lf7_petio    |
| 18                      | Col-0_lf7_prox     |
| 19                      | Col-0_lf7_distal   |
| 20                      | Col-0_whole21d     |
| 21                      | Col-0_whole22d     |
| 22                      | Col-0_whole23d     |
| 23                      | Col-0_senescent    |
| 24                      | Col-0_cauline      |
| 25                      | Col-0_stem_2nd     |
| 26                      | Col-0_stem_1st     |
| 27                      | Col-0_inflo        |
| 28                      | Col-0_flow9        |
| 29                      | Col-0_flow10/11    |
| 30                      | Col-0_flow12       |
| 31                      | Col-0_flow12_sepal |
| 32                      | Col-0_flow12_petal |
| 33                      | Col-0_flow12_stam  |
| 34                      | Col-0_flow12_carp  |
| 35                      | Col-0_flow15       |

|    |                    |
|----|--------------------|
| 36 | Col-0_flow15_pedi  |
| 37 | Col-0_flow15_sepal |
| 38 | Col-0_flow15_petal |
| 39 | Col-0_flow15_stam  |
| 40 | Col-0_flow15_carp  |
| 41 | Col-0_pollen       |
| 42 | Col-0_sil3         |
| 43 | Col-0_sil4         |
| 44 | Col-0_sil5         |
| 45 | Col-0_seed6        |
| 46 | Col-0_seed7        |
| 47 | Col-0_seed8        |
| 48 | Col-0_seed9        |
| 49 | Col-0_seed10       |
| 50 | Col-0_roset7       |
| 51 | Col-0_roset14      |
| 52 | Col-0_roset21      |
| 53 | Col-0_leaf         |
| 54 | Col-0_flower       |
| 55 | Col-0_root_MS1     |
| 56 | Col-0_root_GM-8    |
| 57 | Col-0_root_GM5-8   |
| 58 | Col-0_seedl_GM     |
| 59 | Col-0_seedl_GM5    |
| 60 | Col-0_root_GM-21   |
| 61 | Col-0_root_GM5-21  |
| 62 | Col-0_sedlGM-21    |
| 63 | Col-0_sedlGM5-21   |

---

<sup>a</sup>Submission Number is ME00319 at PLEXdb; TAIR Accession is ExpressionSet:  
1006710873

<sup>b</sup>Tissue descriptions can be found in the public data (Schmid et al., 2005).

**Supplemental Table S3.** Motif matching positions in upstream regions of Group I genes

| Gene Name   | Sequence ID <sup>a</sup> | Start <sup>b</sup> | End <sup>b</sup> | Matching sequence <sup>c</sup> | Strand  |
|-------------|--------------------------|--------------------|------------------|--------------------------------|---------|
| <i>ISA2</i> | AT1G03310                | -339               | -328             | AACAAAAGTAGT                   | Forward |
| <i>GWD1</i> | AT1G10760                | -276               | -265             | TATAAAAGACGA                   | Forward |
| <i>GWD1</i> | AT1G10760                | -49                | -38              | AAGTAAAGTAGA                   | Reverse |
| <i>SS3</i>  | AT1G11720                | -680               | -669             | TCGAAAAGGCGA                   | Reverse |
| <i>GBS1</i> | AT1G32900                | -523               | -512             | ACTTAAAGTAAT                   | Forward |
| <i>AMY3</i> | AT1G69830                | -871               | -860             | TCTCAAAGTACA                   | Forward |
| <i>AMY3</i> | AT1G69830                | -514               | -503             | AATAAAAGGAAA                   | Forward |
| <i>AMY2</i> | AT1G76130                | -834               | -823             | CACAAAAGTCGA                   | Forward |
| <i>AMY2</i> | AT1G76130                | -17                | -6               | CCTTAAAGAAAC                   | Reverse |
| <i>SBE3</i> | AT2G36390                | -656               | -645             | AAGCAAAGGCAA                   | Reverse |
| <i>ISA1</i> | AT2G39930                | -106               | -95              | CCCTAAAGCCCA                   | Forward |
| <i>SS2</i>  | AT3G01180                | -661               | -650             | AACAAAAGCCAT                   | Forward |
| <i>SS2</i>  | AT3G01180                | -69                | -58              | AACAAAAGAAGA                   | Reverse |
| <i>PHS2</i> | AT3G46970                | -812               | -801             | TAGTAAAGAAGT                   | Forward |
| <i>SEX4</i> | AT3G52180                | -827               | -816             | TACCAAAGGAGT                   | Forward |
| <i>BAM2</i> | AT4G00490                | -628               | -617             | TCCCAAAGTAAA                   | Forward |
| <i>BAM2</i> | AT4G00490                | -166               | -155             | CACAAAAGCCCC                   | Forward |
| <i>BAM2</i> | AT4G00490                | -609               | -598             | ACCAAAGAAAC                    | Reverse |
| <i>ISA3</i> | AT4G09020                | -951               | -940             | AACAAAAGTAGT                   | Forward |
| <i>ISA3</i> | AT4G09020                | -402               | -391             | ACCCAAAGGACC                   | Forward |
| <i>ISA3</i> | AT4G09020                | -82                | -71              | TCCCAAAGTCCC                   | Forward |
| <i>SS4</i>  | AT4G18240                | -540               | -529             | TCCAAAAGGAGC                   | Reverse |
| <i>SBE2</i> | AT5G03650                | -140               | -129             | CACAAAAGTAGC                   | Forward |
| <i>MEX1</i> | AT5G17520                | -969               | -958             | TACTAAAGAAGC                   | Forward |
| <i>MEX1</i> | AT5G17520                | -837               | -826             | AAGTAAAGTAGA                   | Forward |
| <i>MEX1</i> | AT5G17520                | -933               | -922             | AAGCAAAGAACT                   | Reverse |
| <i>SS1</i>  | AT5G24300                | -454               | -443             | ACCAAAGCCCA                    | Forward |
| <i>SS1</i>  | AT5G24300                | -250               | -239             | AACCAAAGGCAA                   | Forward |
| <i>SS1</i>  | AT5G24300                | -945               | -934             | TCCAAAAGTAAT                   | Reverse |
| <i>APS1</i> | AT5G48300                | -513               | -502             | AACTAAAGAAGC                   | Forward |
| <i>PGM1</i> | AT5G51820                | -808               | -797             | TCTAAAAGTCAT                   | Forward |
| <i>PGM1</i> | AT5G51820                | -707               | -696             | TATTAAAGACAT                   | Reverse |
| <i>DPE1</i> | AT5G64860                | -914               | -903             | AATTAAAGAAGC                   | Reverse |

<sup>a</sup>Promoter regions were included the 1000 bp from upstream of transcription start site

(+1)

<sup>b</sup>Number assignment is corresponding to the transcription start site (+1)

<sup>c</sup>Sequences matching to the pattern of [ATC] [AC] [CGT] [ATC] AAAGN [AC]  
[GCA] [ATC]



**Supplemental Table S4.** Heat inactivation of PGI activity in extracts of leaf and epidermis from the wild type and *pgil* mutant

|                       | Total activity          | Activity after heat treatment | Heat Inactivation (%) |
|-----------------------|-------------------------|-------------------------------|-----------------------|
|                       | Units / $\mu$ g protein | Units / $\mu$ g protein       |                       |
| WT leaves             | 16.3 $\pm$ 1.8          | 10.2 $\pm$ 1.2                | 37.4                  |
| <i>pgil</i> leaves    | 9.5 $\pm$ 0.5           | 9.3 $\pm$ 0.1                 | 2.2                   |
| WT epidermis          | 13.4 $\pm$ 1.1          | 8.2 $\pm$ 0.3                 | 38.8                  |
| <i>pgil</i> epidermis | 7.4 $\pm$ 0.1           | 7.2 $\pm$ 0.3                 | 2.7                   |

Values are the mean  $\pm$  S.E. from three replicate extracts, each extract made from three plants. The amount of proteins in the extract was quantified with Lowry reagent. For heat inactivation, the extracts were treated at 50°C for 10 min in a thermocycler.

#### **SUPPLEMENTAL LITERATURE CITED**

- Kotting O, Santelia D, Edner C, Eicke S, Marthaler T, Gentry MS, Comparot-Moss S, Chen J, Smith AM, Steup M, Ritte G, Zeeman SC** (2009) STARCH-EXCESS4 is a laforin-like Phosphoglucan phosphatase required for starch degradation in *Arabidopsis thaliana*. *Plant Cell* **21**: 334-346
- Niittyla T, Comparot-Moss S, Lue WL, Messerli G, Trevisan M, Seymour MD, Gatehouse JA, Villadsen D, Smith SM, Chen J, Zeeman SC, Smith AM** (2006) Similar protein phosphatases control starch metabolism in plants and glycogen metabolism in mammals. *J Biol Chem* **281**: 11815-11818
- Schmid M, Davison TS, Henz SR, Pape UJ, Demar M, Vingron M, Scholkopf B, Weigel D, Lohmann JU** (2005) A gene expression map of *Arabidopsis thaliana* development. *Nat Genet* **37**: 501-506
- Smith SM, Fulton DC, Chia T, Thorneycroft D, Chapple A, Dunstan H, Hylton C, Zeeman SC, Smith AM** (2004) Diurnal changes in the transcriptome encoding enzymes of starch metabolism provide evidence for both transcriptional and posttranscriptional regulation of starch metabolism in *Arabidopsis* leaves. *Plant Physiol* **136**: 2687-2699
